# Supplementary material
Source: Research Square preprint supplement (doi:10.21203/rs.3.rs-9318154/v1)
Supplement: Supplementary file 1 [file 0b9487e6d6bf3c0956496523.docx]

| **Variable** | **NDD**  **(64 total patients with a mean age at last follow up of 14.1 years)**  n/Tot.* (%) | **Non-NDD**  **(87 total patients with a mean age at last follow up of 38.9 years)**  n/Tot.* (%) | ***OR (95% CI)*** | ***Age-adjusted OR (95% CI)*** |
| --- | --- | --- | --- | --- |
| Typical mucocutaneous lesions | 26/39 (66.7) | 59/74 (79.7) | 0.508 (0.212-1.219) | 1.309 (0.430-3.986) |
| Benign thyroid disease | 14/52 (26.9) | 58/77 (75.3) | **0.121 (0.054-0.269)** | 0.419 (0.154-1.135) |
| Gastrointestinal polyps | 11/27 (40.7) | 35/57 (61.4) | 0.432 (0.170-1.100) | 3.521 (0.754-1.447) |
| Lhermitte–Duclos disease | 0/55 (0) | 7/82 (8.5) | ND | ND |
| Any cancer | 6/53 (11.3) | 33.70 (41.3) | **0.182 (0.070-0.474)** | 1.201 (0.320-4.449) |
| Thyroid cancer | 2/64 (3.1) | 13/87 (14.9) | **0.184 (0.04-0.845)** | 0.407 (0.071-2.328) |
| Renal cancer | 0/64 (0) | 6/87 (6.9) | ND | ND |
| Breast cancer | 4/64 (6.3) | 19/87 (21.8) | **0.239 (0.077-0.741)** | 1.521 (0.302-5.187) |
| Melanoma | 0/64 (0) | 2/87 (2.3) | ND | ND |
| Endometrial cancer | 1/64 (1.6) | 8/87 (9.2) | 0.157 (0.019-1.286) | 0.611 (0.058-6.429) |

ND = The Odds Ratio cannot be computed because one cell is equal to 0.
