# Supplementary material
Source: Research Square preprint supplement (doi:10.21203/rs.3.rs-9318154/v1)
Supplement: Supplementary file 2 [file 334bb9d3f3688fd94181d89c.docx]

| **Variant features** | | **Neurodevelopmental Disorder** | | ***p*-value** |
| --- | --- | --- | --- | --- |
| **Present**  (59 individuals) | **Absent**  (84 individuals) |  |
| Variant type | Nonsense | 16 (27.1%) | 24 (28.6%) | 0.455 |
| Frameshift | 9 (15.3%) | 21 (25.0%) |
| Missense | 22 (33.9%) | 21 (25.0%) |
| Splicing | 6 (10.2%) | 13 (15.5%) |
| Deletion | 5 (8.5%) | 5/84 (5.6%) |
| In-frame deletion | 1 (1.7%) | 0 |
| Effect on protein | Predicted truncating | 36 (61.0%) | 63 (75.0%) | 0.098 |
| Missense/In-frame | 23 (39.0%) | 21 (25.0%) |
|  |  |  |  |  |
| Protein domain (for missense variants) | C2 | 17/23 (73.9%) | 19/21 (90.5%) | 0.245 |
| PD | 6/23 (26.1%) | 2/21 (9.5%) |
|  |  |  |  |  |
| Inheritance | *De novo* | 25/46 (54.4%) | 6/42 (14.3%) | <0.001 |
| Inherited | 21/46 (45.7%) | 36/42 (85.7%) |
