# Supplementary material
Source: Research Square preprint supplement (doi:10.21203/rs.3.rs-9318154/v1)
Supplement: Supplementary file 3 [file 4447315f325ab2644004bd92.docx]

| **Variable** | **Index cases**  (117 total patients with a mean age at follow-up of 25.0 years)  n/Tot.* (%) or mean (SD) | **Relatives**  (50 total cases with a mean age at last follow up of 35.9 years)  n/Tot.* (%) or mean (SD) | ***OR (95% CI)*** | ***Age-adjusted OR (95% CI)*** |
| --- | --- | --- | --- | --- |
| Macrocephaly | 99/100 (99.0) | 30/33 (90-9) | 0.101 (0.010-1.007) | 0.058 (0.003-1.120) |
| Typical mucocutaneous lesions | 66/86 (76.7) | 27/36 (75.0) | 0.909 (0.368-2.248) | 0.526 (0.188-1.475) |
| Benign thyroid disease | 47/91 (51.6) | 27/42 (64.3) | 1.685 (0.793-3.579) | 0.878 (0.335-2.302) |
| Gastrointestinal polyps | 38/68 (55.9) | 14/23 (60.9) | 1.228 (0.468-3.222) | 0.715 (0.237-2.158) |
| Lhermitte–Duclos disease | 10/99 (10.1) | 1/45 (2.2) | 0.202 (0.025-1.631) | 0.152 (0.018-1.250) |
| Any cancer | 30/100 (30.0) | 13/42 (31.0) | 1.046 (0.479-2.285) | 0.523 (0.207-1.320) |
| Age at first tumor# | 34.0 (14.9) | 41.8 (7.2) | NA | NA |
| Neurodevelopmental disorder | 54/104 (51.9) | 10/47 (21.3) | **0.250 (0.113-0.556)** | 0.451 (0.177-1.154) |

*Of those for which the information was available.

#t-test=-1.785, p=0.082
