# Supplementary material
Source: Research Square preprint supplement (doi:10.21203/rs.3.rs-9318154/v1)
Supplement: Supplementary file 4 [file 6c14fce58f41e90813d7d09f.docx]

| **Feature**  (number of individuals with the information) | | **Number** | **%** |
| --- | --- | --- | --- |
| Sex  (167) | Male | 92 | 55.1 |
| Female | 75 | 44.9 |
| Role in family testing  (167) | Index case | 117 | 70.1 |
| Relative | 50 | 29.9 |
| Type of variant  (167) | Predicted truncating# | 111 | 66.5 |
| Missense/in-frame | 56 | 33.5 |
| Inheritance  (101) | *De novo* | 38 | 37.6 |
| Inherited | 63 | 62.4 |
| Macrocephaly  (133) | Present | 129 | 97.0 |
| Typical Mucocutaneous Lesions  (122) | Present | 93 | 76.2 |
| Thyroid Benign Disease  (133) | Present | 74 | 55.6 |
| Gastrointestinal Polyps  (91) | Present | 52 | 57.1 |
| Malignant tumours  (142) | Present | 47 | 33.1 |
| Lhermitte-Duclos Disease  (144) | Present | 11 | 7.6 |
| Developmental Delay/Intellectual Disability  (150) | Present | 63 | 42.0 |
| Autism Spectrum Disorder  (143) | Present | 24 | 16.8 |
| Neurodevelopmental Disorder  (151) | Present | 64 | 42.4 |
