# Supplementary material
Source: Research Square preprint supplement (doi:10.21203/rs.3.rs-9318154/v1)
Supplement: Supplementary file 4 [file 5254dbe6d662a1fde84aa6b6.xlsx]

## Sheet: Foglio1
HGVS Nucleotide	HGVS Protein	PhyloP100	Splicing prediction (Splice AI)	CADD	REVEL	CinPred	MetaSVM	SIFT
c.39_41del	p.Arg15del	8.851
c.75G>T	p.Leu25Phe	3.033		32	0.899	0.9828	1.087	0.003
c.165-18T>A	p.?	1.544	(DS_AL=0,95), Pangolin (score=0,75).	17.7
c.286C>G	p.Pro96Ala	7.448		28.5	0.872	0.9965	1.0435	0
c.413A>G	p.Tyr138Cys	8.919		28.7	0.962	0.9995	0.9964	0
c.461T>C	p.Phe154Ser	7.661		31	0.928	0.9857	0.7091	0.007
c.593T>C	p.Met198Thr	7.614		25.1	0.63	0.9407	-0.2646	0.003
c.830C>A	p.Thr277Lys	7.451		33	0.98	0.9945	1.0966	0
