# Supplementary material
Source: Research Square preprint supplement (doi:10.21203/rs.3.rs-9318154/v1)
Supplement: Supplementary file 5 [file 58ecf126ffc19ac999b39d52.xlsx]

## Sheet: Foglio1
HGVS Nucleotide	HGVS Protein	Type of variant	Variant effect	Protein domain: C2 or Phosphatase domanin (PD)	gnomAD (ExomesVersion: 2.1.1) Population frequencies TOT (last access: 20/02/2026)	ClinVar classification (last access: 20/02/2026)	ClinGen classification [Mester et al., 2018]	N. of cases	N. of families
c.20del	p.Glu7Glyfs*17	Frameshift	Predicted truncating	PD	not found	Not reported	Pathogenic	1	1
c.24del	p.Ile8Metfs*16	Frameshift	Predicted truncating	PD	not found	Not reported	Likely Pathogenic	2	1
c.39_41del	p.Arg15del	In-frame	Missense/In-frame	PD	not found	VUS	VUS	2	1
c.45A>C	p.Arg15Ser	Missense	Missense/In-frame	PD	not found	Pathogenic	Pathogenic	1	1
c.45A>T	p.Arg15Ser	Missense	Missense/In-frame	PD	not found	Pathogenic	Pathogenic	1	1
c.71A>T	p.Asp24Val	Missense	Missense/In-frame	PD	not found	Likely Pathogenic	Likely Pathogenic	1	1
c.75G>T	p.Leu25Phe	Missense	Missense/In-frame	PD	not found	VUS	VUS	1	1
c.77C>A	p.Thr26Asn	Missense	Missense/In-frame	PD	not found	Likely Pathogenic	Likely Pathogenic	1	1
c.77delC	p.Tyr27Ilefs*27	Frameshift	Predicted truncating	PD	not found	Not reported	Likely Pathogenic	1	1
c.80-259_164+1293del	p.?	Deletion	Predicted truncating		not found	Not reported	Pathogenic	4	2
c.106G>A	p.Gly36Arg	Missense	Missense/In-frame	PD	not found	Likely Pathogenic	Likely Pathogenic	2	1
c.144C>A	p.Asn48Lys	Missense	Missense/In-frame	PD	not found	Pathogenic/Likely Pathogenic	Pathogenic	1	1
c.157_158dup	p.Val54*	Nonsense	Predicted truncating	PD	not found	Not reported	Likely Pathogenic	1	1
c.165-18T>A	p.?	Splicing	Predicted truncating		not found	Not reported	VUS	1	1
c.200delT	p.Ile67Asnfs*32	Frameshift	Predicted truncating	PD	not found	Not reported	Likely Pathogenic	2	1
c.202T>C	p.Tyr68His	Missense	Missense/In-frame	PD	not found	Pathogenic	Pathogenic	3	2
c.209+1G>C	p.?	Splicing	Predicted truncating		not found	Pathogenic	Pathogenic	2	1
c.210-1G>C	p.Ala72Thrfs*5	Splicing	Predicted truncating		not found	Likely pathogenic	Likely pathogenic	1	1
c.210-12C>G	p.?	Splicing	Predicted truncating		not found	Likely Pathogenic	Likely Pathogenic	2	2
c.249C>A	p.Cys83*	Nonsense	Predicted truncating	PD	not found	Pathogenic	Pathogenic	1	1
c.253+1G>A	p.?	Splicing	Predicted truncating		not found	Pathogenic	Pathogenic	3	2
c.253+5G>C	p.?	Splicing	Predicted truncating		not found	Likely Pathogenic	Likely Pathogenic	1	1
c.254-2A>C	p.?	Splicing	Predicted truncating		not found	Not reported	Likely Pathogenic	2	1
c.264T>A	p.Tyr88*	Nonsense	Predicted truncating	PD	not found	Pathogenic	Pathogenic	2	1
c.286C>G	p.Pro96Ala	Missense	Missense/In-frame	PD	not found	Conflicting	VUS	1	1
c.302_303dup	p.Lys102Serfs*12	Frameshift	Predicted truncating	PD	not found	Not reported	Likely Pathogenic	3	1
c.303del	p.Lys102Asnfs*11	Frameshift	Predicted truncating	PD	not found	Not reported	Likely Pathogenic	2	1
c.323 T>C	p.Leu108Pro	Missense	Missense/In-frame	PD	not found	Pathogenic	Pathogenic	1	1
c.325dup	p.Asp109Glyfs*6	Frameshift	Predicted truncating	PD	not found	Not reported	Likely Pathogenic	1	1
c.331T>C	p.Trp111Arg	Missense	Missense/In-frame	PD	not found	Pathogenic	Pathogenic	1	1
c.335T>C	p.Leu112Pro	Missense	Missense/In-frame	PD	not found	Pathogenic	Pathogenic	2	1
c.335T>G	p.Leu112Arg	Missense	Missense/In-frame	PD	not found	Pathogenic	Pathogenic	3	2
c.353A>C	p.Hys118Pro	Missense	Missense/In-frame	PD	not found	Likely Pathogenic	Likely Pathogenic	1	1
c.355G>C	p.Val119Leu	Missense	Missense/In-frame	PD	not found	Likely Pathogenic	Likely Pathogenic	2	1
c.366dup	p.His123Serfs*3	Frameshift	Predicted truncating	PD	not found	VUS	Pathogenic	1	1
c.368A>T	p.His123Pro	Missense	Missense/In-frame	PD	not found	Not reported	Likely Pathogenic	1	1
c.37A>G	p.Lys13Glu	Missense	Missense/In-frame	PD	not found	Pathogenic/Likely Pathogenic	Pathogenic	1	1
c.386delG	p.Gly129Aspfs*5	Frameshift	Predicted truncating	PD	not found	Pathogenic	Pathogenic	2	1
c.388C>T	p.Arg130*	Nonsense	Predicted truncating	PD	1.19e-05	Pathogenic	Pathogenic	10	5
c.389G>A	p.Arg130Gln	Missense	Missense/In-frame	PD	not found	Pathogenic	Pathogenic	6	4
c.406T>C	p.Cys136Arg	Missense	Missense/In-frame	PD	not found	Pathogenic	Pathogenic	2	1
c.413A>G	p.Tyr138Cys	Missense	Missense/In-frame	PD	not found	VUS	VUS	1	1
c.414G>T	p.Tyr138*	Nonsense	Predicted truncating	PD	not found	Pathogenic	Pathogenic	1	1
c.445C>T	p.Gln149*	Nonsense	Predicted truncating	PD	not found	Pathogenic	Pathogenic	1	1
c.455T>A	p.Leu152Gln	Missense	Missense/In-frame	PD	not found	Not reported	Likely Pathogenic	1	1
c.461T>C	p.Phe154Ser	Missense	Missense/In-frame	PD	3.19e-05	VUS	VUS	1	1
c.464A>C	p.(Tyr155Ser)	Missense	Missense/In-frame	PD	not found	Pathogenic	Pathogenic	2	1
c.464A>G	p.Tyr155Lys	Missense	Missense/In-frame	PD	not found	Pathogenic	Pathogenic	1	1
c.469_470insGG	p.Glu157Glyfs*3	Frameshift	Predicted truncating	PD	not found	Pathogenic	Pathogenic	1	1
c.485_487delinsC	p.Asp162Alafs*17	Frameshift	Predicted truncating	PD	not found	Pathogenic/Likely Pathogenic	Pathogenic	1	1
c.510T>G	p.Ser170Arg	Missense	Missense/In-frame	PD	not found	Pathogenic	Pathogenic	1	1
c.517C>T	p.Arg173Cys	Missense	Missense/In-frame	PD	not found	Pathogenic	Pathogenic	1	1
c.518G>A	p.Arg173His	Missense	Missense/In-frame	PD	0.00000796	Pathogenic	Pathogenic	2	2
c.529A>T	p.Met198Leu	Missense	Missense/In-frame	C2	not found	Not reported	Likely Pathogenic	1	1
c.573_580del	p.Ala192Valfs*7	Frameshift	Predicted truncating	C2	not found	Not reported	Likely Pathogenic	1	1
c.593T>C	p.Met198Thr	Missense	Missense/In-frame	C2	not found	VUS	VUS	2	1
c.611C>T	p.Pro204Leu	Missense	Missense/In-frame	C2	not found	VUS	Pathogenic	1	1
c.618delC	p.Phe206Leufs*15	Frameshift	Predicted truncating	C2	not found	Not reported	Likely Pathogenic	1	1
c.623delG	p.Gly208Alafs*13	Frameshift	Predicted truncating	C2	not found	Pathogenic	Pathogenic	2	1
c.633C>G	p.Cys211Trp	Missense	Missense/In-frame	C2	not found	Pathogenic	Pathogenic	1	1
c.634+2T>G	p.?	Splicing	Predicted truncating		not found	Pathogenic	Pathogenic	1	1
c.697C>T	p.Arg233*	Nonsense	Predicted truncating	C2	not found	Pathogenic	Pathogenic	11	8
c.714_715del	p.Met239Valfs*3	Frameshift	Predicted truncating	C2	not found	Not reported	Likely Pathogenic	2	1
c.720C>G	p.Tyr240*	Nonsense	Predicted truncating	C2	not found	Pathogenic	Pathogenic	2	1
c.721_723del	p.Phe241del	In-frame	Missense/In-frame	C2	not found	Not reported	Likely Pathogenic	1	1
c.737C>T	p.Pro246Leu	Missense	Missense/In-frame	C2	not found	Pathogenic	Pathogenic	1	1
c.755A>G	p.Asp252Gly	Missense	Missense/In-frame	C2	not found	Pathogenic	Pathogenic	1	1
c.755A>T	p.Asp252Val	Missense	Missense/In-frame	C2	not found	Pathogenic	Pathogenic	2	2
c.830C>A	p.Thr277Lys	Missense	Missense/In-frame	C2	not found	VUS	VUS	1	1
c.783_784delGA	p.Asn262Glnfs*35	Frameshift	Predicted truncating	C2	not found	Pathogenic	Pathogenic	1	1
c.800dup	p. Asp268GlyfsTer30	Frameshift	Predicted truncating	C2	not found	Pathogenic	Pathogenic	1	1
c.801+1G>T	p.?	Splicing	Predicted truncating		not found	Pathogenic	Pathogenic	1	1
c.80A>G	p.Tyr27Cys	Missense	Missense/In-frame	PD	not found	Likely Pathogenic	Likely Pathogenic	1	1
c.865A>T	p.Lys289Ter	Nonsense	Predicted truncating	C2	not found	Pathogenic	Pathogenic	1	1
c.884dupT	p.Cys296Metfs*2	Frameshift	Predicted truncating	C2	not found	Pathogenic	Pathogenic	4	2
c.892C>T	p.Gln298*	Nonsense	Predicted truncating	C2	not found	Pathogenic	Pathogenic	1	1
c.919G>T	p.Glu307*	Nonsense	Predicted truncating	C2	not found	Pathogenic	Pathogenic	1	1
c.950_953del	p.Thr319_Leu320delinsTer	Frameshift	Predicted truncating	C2	not found	Pathogenic	Pathogenic	2	2
c.955_958del	p.Thr319*	Nonsense	Predicted truncating	C2	not found	Pathogenic	Pathogenic	5	4
c.980_981dup	p.Ala328Lysfs*17	Frameshift	Predicted truncating	C2	not found	Not reported	Likely Pathogenic	1	1
c.1003C>T	p.Arg335*	Nonsense	Predicted truncating	C2	not found	Pathogenic	Pathogenic	6	4
c.1026+1G>A	p.?	Splicing	Predicted truncating		ƒ = 0	Pathogenic	Pathogenic	3	2
c.1027-2A>G	p.?	Splicing	Predicted truncating		not found	Pathogenic	Pathogenic	5	1
c.1039_1043del	p.Phe347Lysfs*12	Frameshift	Predicted truncating	C2	not found	Not reported	Likely Pathogenic	1	1
c.1133_1136del	p.Arg378IlefsTer37	Frameshift	Predicted truncating	C2	not found	VUS	Likely Pathogenic	2	1
exon 2 deletion	p.?	Deletion	Predicted truncating		not found	Not reported	Pathogenic	1	1
whole gene deletion	p.?	Deletion	Predicted truncating		not found	Not reported	Pathogenic	6	6
		In-frame	In frame
