# Supplementary material
Source: Research Square preprint supplement (doi:10.21203/rs.3.rs-9318154/v1)
Supplement: Supplementary file 5 [file c5054ad6c9b55e5f9e554895.docx]

| **Tumour** | **30y Overall** | **30y Males** | **30y Females** | **40y Overall** | **40y Males** | **40y Females** | **50y Overall** | **50y Males** | **50y Females** | **60y Overall** | **60y Males** | **60y Females** |
| --- | --- | --- | --- | --- | --- | --- | --- | --- | --- | --- | --- | --- |
| **Any cancer** | 0.15 (0.09–0.25) | 0.05 (0.02–0.17) | 0.23 (0.13–0.39) | 0.29 (0.20–0.41) | 0.12  (0.05–0.28) | 0.44 (0.30–0.61) | 0.64 (0.51–0.78) | 0.33  (0.17–0.59) | 0.86 (0.71–0.95) | 0.71 (0.57–0.84) | 0.42 (0.22–0.69) | 0.90 (0.76–0.98) |
| **Thyroid cancer** | 0.05 (0.02–0.12) | 0.01 (0.00–0.08) | 0.08 (0.03–0.21) | 0.16 (0.09–0.26) | 0.11 (0.04–0.28) | 0.20 (0.10–0.37) | 0.24 (0.14–0.39) | 0.16 (0.07–0.38) | 0.31 (0.17–0.54) | 0.34 (0.18–0.59) | 0.16 (0.07–0.38) | 0.31* (0.17–0.54) |
| **Renal cancer** | 0.01 (0.00–0.08) | 0.02 (0.00–0.16) | 0.00 (0.00–0.00) | 0.01 (0.00–0.08) | 0.02 (0.00–0.16) | 0.00 (0.00–0.00) | 0.11 (0.03–0.38) | 0.16 (0.05–0.48) | 0.00 (0.00–0.00) | 0.36 (0.13–0.76) | 0.41 (0.17–0.78) | 0.00 (0.00–0.00) |
| **Breast cancer** | NA | NA | 0.07 (0.02–0.19) | 0.24 (0.14–0.41) | NA | 0.26 (0.15–0.43) | NA | NA | 0.82 (0.65–0.94) | NA | NA | 0.88 (0.71–0.98) |
| **Melanoma** | 0.04 (0.01–0.11) | 0.02 (0.00–0.16) | 0.05 (0.01–0.18) | 0.04 (0.01–0.11) | 0.02 (0.00–0.16) | 0.05 (0.01–0.18) | 0.06 (0.02–0.17) | 0.02 (0.00–0.16) | 0.11 (0.03–0.33) | 0.06 (0.02–0.17) | 0.02 (0.00–0.16) | 0.11*  (0.03–0.33) |
| **Endometrial cancer** | NA | NA | 0.09 (0.03–0.22) | NA | NA | 0.13 (0.05–0.28) | NA | NA | 0.29 (0.14–0.52) | NA | NA | 0.57 (0.22–0.94) |
| **Colorectal cancer** | 0.01 (0.00–0.08) | 0.00 (0.00–0.00) | 0.02 (0.00–0.14) | 0.02 (0.01–0.10) | 0.00 (0.00–0.00) | 0.05 (0.01–0.20) | 0.02 (0.01–0.10) | 0.00 (0.00–0.00) | 0.05  (0.01–0.20) | 0.12 (0.02–0.46) | 0.12 (0.02–0.61) | 0.05 ** (0.01–0.20) |
| **Other cancers** | 0.03 (0.01–0.09) | 0.02 (0.01–0.09) | 0.03 (0.00–0.18) | 0.03 (0.01–0.09) | 0.02 (0.01–0.09) | 0.03 (0.00–0.18) | 0.12 (0.05–0.29) | 0.12 (0.04–0.35) | 0.12 (0.03–0.47) | 0.30 (0.13–0.61) | 0.23 (0.08–0.57) | 0.12* (0.03–0.47) |

*no occurrence of thyroid tumours, melanomas and other cancers after 50 years in females.

**no occurrence of colorectal cancer after 40 years in females.
