# Supplementary material
Source: Research Square preprint supplement (doi:10.21203/rs.3.rs-9318154/v1)
Supplement: Supplementary file 6 [file fe0238df54a8b12051e3cb89.docx]

| **Tumour** | **n of cases/Tot*** | **Frequency (%)** | **Mean age at diagnosis (years)** | **Age range (years)** |
| --- | --- | --- | --- | --- |
| Breast cancer | 25/75 | 33.3 | 40.3 | 26-51 |
| Endometrial Cancer | 10/75 | 13.3 | 42.1 | 27-63 |
| Thyroid cancer | 16/167 | 9.6 | 32.3 | 10-55 |
| Renal Cancer | 6/167 | 3.6 | 53.3 | 43-74 |
| Melanoma | 4/167 | 2.4 | 35.0 | 25-46 |
| Colorectal cancer | 4/167 | 2.4 | 47.5 | 22-61 |
| Vulvar cancer | 1/75 | 1.3 | 70.0 | 70 |
| Medulloblastoma | 2/167 | 1.2 | 1.0 | 1 |
| Lymphoma | 2/167 | 1.2 | 55.5 | 54-57 |
| Gastric cancer | 1/167 | 0.6 | 41.0 | 41 |
| Hepatic cancer | 1/167 | 0.6 | 46.0 | 46 |
| Gastrointestinal Stromal Tumour (GIST) | 1/167 | 0.6 | 36.0 | 36 |
| Pancreatic cancer | 1/167 | 0.6 | 52.0 | 52 |
